# Supplementary material
Source: HighWire-hosted journal article supplement (https://bmjopen.bmj.com/content/9/5/e025303)
Supplement: inline-supplementary-material-1 [file inline-supplementary-material-1.pdf]

## Supplementary Text 1 - Practitioner Assessment of Network Type (PANT)

1. How far away does your nearest relative live? Possible responses were 0 (no relatives); 1 (within 1.6km/same home); 2 (1.6km-9.6km); 3 (9.7km-25.7km); 4 (25.8km – 80.5km); 5 (above 80.5km).
2. Where does your nearest sister or brother live? Possible responses were 0 (no siblings); 1 (within 1.6km/same home); 2 (1.6km-9.6km); 3 (9.7km-25.7km); 4 (25.8km – 80.5km); 5 (above 80.5km).
3. Where does your nearest child live? Possible responses were 0 (no child); 1 (within 1.6km/same home); 2 (1.6km-9.6km); 3 (9.7km-25.7km); 4 (25.8km – 80.5km); 5 (above 80.5km).
4. How often do you see any of your children or other relatives to speak to? Possible responses were 0 (never); 1 (daily); 2 (2-3 times a week); 3 (at least weekly); 4 (at least monthly); 5 (less often).
5. How often do you have a chat or do something with one of your friends? Possible responses were 0 (never); 1 (daily); 2 (2-3 times a week); 3 (at least weekly); 4 (at least monthly); 5 (less often).
6. How often do you see any of your neighbours to have a chat or do something with? Possible responses were 0 (never); 1 (daily); 2 (2-3 times a week); 3 (at least weekly); 4 (at least monthly); 5 (less often).
7. Do you attend religious meetings/visit religious places? Possible responses were 0 (no); (1) yes, regularly); 2 (yes, occasionally).
8. Do you attend meetings of any community or social groups, such as clubs, lectures or anything like that? Possible responses were 0 (no); (1) yes, regularly); 2 (yes, occasionally).
