# Supplementary material
Source: HighWire-hosted journal article supplement (https://bmjopen.bmj.com/content/9/5/e025303)
Supplement: inline-supplementary-material-2 [file inline-supplementary-material-2.pdf]

## Supplementary Text 2 – The Social Support Network Typologies

1. The family dependent support network is characterised by close family ties and little contact with friends and neighbours.
2. The locally integrated support network includes close relationships with family, relatives, friends, neighbours and high involvement in religious or community activities.
3. The locally self-contained support network is described by arm's-length relationships with family and relatives, little involvement in the community and relies primarily on neighbours.
4. The wider community-focused support network is classified by absence of local family and relatives, but has active relationships with distant relatives, has many friends and involved in community activities.
5. The private restricted support network has a lack of local family and relatives, little contact with neighbours and friends and low level of involvement in community activities.
