# Supplementary material
Source: HighWire-hosted journal article supplement (https://bmjopen.bmj.com/content/9/5/e025303)
Supplement: inline-supplementary-material-3 [file inline-supplementary-material-3.pdf]

### Supplementary Text 3 – PANT Characteristics of each social support network type

#### 1. Family dependent social support network

Participants mostly stayed at the same home/ within 1.6km from the nearest relative (82.4%) or their child (89.2%). Contact with friends varied from “daily” to “less often” (15.7-23.7%). 37.1% of the participants in this network had no contact or very infrequent contact (24.1%) with the neighbors. Majority of the participants (76.6%) attended religious activities but were not involved in social or community activities (83.2%).

#### 2. Locally- integrated social support network

Most participants either stayed at the same home/within 1.6km (46.8%) or 1.6km-9.6km (38.8%) from their nearest relative. They also stayed at the same home/within 1.6km from their child (69.3%). Contact with friends and neighbors ranged from daily (39.3% and 36.4%) to 2-3 times per week (37.1% and 35.7%). Majority of the participants (88.2%) attended religious activities but were not involved in social or community activities (53.6%).

#### 3. Locally self-contained social support network

Participants in this network mostly stayed 9.7km -25.7km away from their nearest relative (50.4%) or their child (36.1%). Contact with friends was on daily (30.2%) or monthly (33.3%) basis. Contact with neighbors was more frequent, on either daily (23.6%) or weekly (22.4%) basis. While they attended religious activities (51.6%), they were not involved in social or community activities (83.4%).

#### 4. Wider community-focused social support network

More than half of the participants in this network stayed further than 80.5km away from their nearest relative (59.0%) or their child (82.4%) and had the highest percentage of

participants who reported having no relatives (23.4%). They contacted their friends and neighbours at least weekly (57.4% and 38.5%). Majority of the participants (76.1%) attended religious activities regularly and slightly more than half (58.9%) attended social or community activities. There were no reported cases of dementia in this network.

#### 5. Private social support network

This network comprised more participants aged more than 85 years. 31.9% and 66.1% of the participants stayed in the same home/within 1.6km; 23.0% and 20.7% of them stayed more than 80.5km away from their nearest relative and child respectively. Most of them contacted their friends on a daily basis (48.9%) but reported that they have no contact (42.3%) or infrequent contact (35.1%) with their neighbours. A vast majority of them (93.1%) did not attend any religious activities and none of them was involved in social or community activities. Disability was highest in this network (mean WHODAS 2.0 score = 32.3).

#### 6. Non-conclusive network

Participants in this network were either borderline between two network types, or were unclassified. A quarter of the participants aged more than 85 years were in this network. There were no distinct characteristics among the participants in this network.
